# Supplementary material for: Toxoplasma gondii infection associated with inflammasome activation and neuronal injury
Source: PubMed Central journal article supplement (PMC10912117; doi:10.1038/s41598-024-55887-9), 2024-03-04
Supplement: 41598_2024_55887_MOESM1_ESM.pdf [file 41598_2024_55887_MOESM1_ESM.pdf]

## **Supplementary material**

### **Toxoplasma gondii infection associated with inflammasome activation and neuronal injury**

Dimitrios Andreou, Nils Eiel Steen, Lynn Mørch-Johnsen, Kjetil Nordbø Jørgensen, Laura A. Wortinger, Claudia Barth, Attila Szabo, Kevin S. O'Connell, Tove Lekva, Gabriela Hjell, Ingrid Torp Johansen, Monica B. E. G. Ormerod, Unn K. Haukvik, Pål Aukrust, Srdjan Djurovic, Robert H. Yolken, Ole A. Andreassen, Thor Ueland, Ingrid Agartz

## Distribution of neuron-specific enolase and interleukin-18

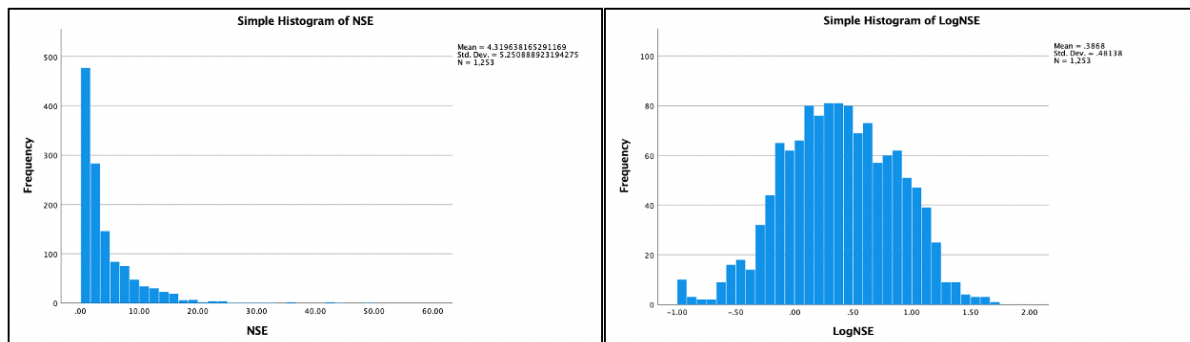

**Suppl. Figure 1.** Distribution of plasma neuron-specific enolase (NSE) (ng/ml) and logNSE (logarithmic transformation;  $\log_{10}$ ) concentrations in the whole sample (n=1253). The distribution of logNSE was approximately normally distributed as evaluated by visual inspection

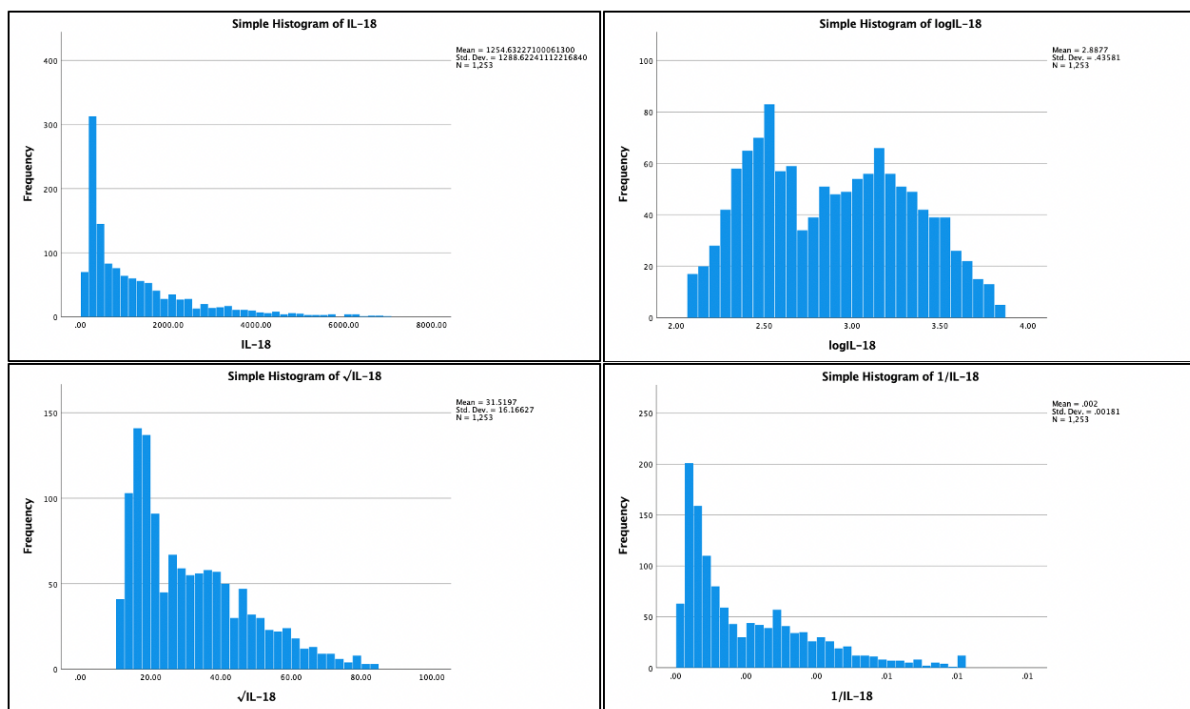

**Suppl. Figure 2.** Distribution of plasma interleukin-18 (IL-18) (pg/ml), logIL-18 (logarithmic transformation;  $\log_{10}$ ),  $\sqrt{IL-18}$  (square root transformation) and 1/IL-18 (reciprocal transformation) concentrations in the whole sample (n=1253)

## Cytomegalovirus analysis

|                                     | CMV-           |                   | CMV+           |                   | P value <sup>2</sup> |
|-------------------------------------|----------------|-------------------|----------------|-------------------|----------------------|
|                                     | N <sup>1</sup> | Mean (SD)<br>or % | N <sup>1</sup> | Mean (SD)<br>or % |                      |
| Patient/control status (% patients) | 541            | 56.4              | 712            | 60.4              | 0.153                |
| Sex (% females)                     | 541            | 43.1              | 712            | 47.8              | 0.099                |
| Age (years)                         | 541            | 31.4 (9.7)        | 712            | 33.2 (10.3)       | <b>0.002</b>         |
| Education years                     | 513            | 13.3 (2.4)        | 670            | 13.3 (2.6)        | 0.941                |
| Handedness (right-handedness %)     | 513            | 86.9              | 669            | 90.4              | 0.058                |
| BMI (kg/m <sup>2</sup> )            | 509            | 25.4 (4.6)        | 664            | 25.8 (4.7)        | 0.101                |
| AUDIT                               | 363            | 7 (5.4)           | 476            | 6.6 (6.1)         | 0.299                |
| DUDIT                               | 378            | 2.3 (5.7)         | 500            | 2.2. (6.1)        | 0.897                |

**Suppl. table 1.** Group differences between cytomegalovirus (CMV) immunoglobulin G (IgG) seronegative (CMV-) and seropositive (CMV+) participants in patient/control status, sex, age, education years, handedness (right-handedness vs. left-handedness/ambidexterity), body mass index (BMI), alcohol use disorder identification test (AUDIT) score and drug use disorder identification test (DUDIT) score in the whole sample. P-values <0.05 shown in bold

<sup>1</sup>Number of participants with data for each variable

<sup>2</sup>Chi-square test or t-test

To investigate putative interaction effects, we ran full factorial median regressions: cytomegalovirus (CMV) status, diagnostic group status, sex and age on NSE and IL-18. In the NSE analysis, there were no three-way (CMV status-by-diagnostic group status-by sex,  $p=0.724$ ) or two-way interactions (CMV status-by-diagnostic group status,  $p=0.845$ , CMV status-by-sex,  $p=0.419$  or diagnostic group status-by-sex,  $p=0.642$ ). The corresponding p-values for the IL-18 analysis were 0.488, 0.840, 0.776 and 0.764.

## Herpes simplex virus 1 analysis

|                                     | HSV1-          |                   | HSV1+          |                   | P value <sup>2</sup> |
|-------------------------------------|----------------|-------------------|----------------|-------------------|----------------------|
|                                     | N <sup>1</sup> | Mean (SD)<br>or % | N <sup>1</sup> | Mean (SD)<br>or % |                      |
| Patient/control status (% patients) | 686            | 57.7              | 567            | 59.8              | 0.461                |
| Sex (% females)                     | 686            | 46.6              | 567            | 44.6              | 0.474                |
| Age (years)                         | 686            | 31.2 (9.9)        | 567            | 33.8 (10.1)       | <b>&lt;0.001</b>     |
| Education years                     | 650            | 13.4 (2.6)        | 553            | 13.3 (2.5)        | 0.347                |
| Handedness (right-handedness %)     | 649            | 88.6              | 533            | 89.3              | 0.700                |
| BMI (kg/m <sup>2</sup> )            | 646            | 25.4 (4.6)        | 527            | 25.9 (4.7)        | <b>0.049</b>         |
| AUDIT                               | 461            | 6.7 (5.5)         | 378            | 6.9 (6.2)         | 0.621                |
| DUDIT                               | 472            | 2.1 (5.5)         | 406            | 2.5 (6.4)         | 0.310                |

**Suppl. Table 2.** Group differences between herpes simplex virus 1 immunoglobulin G (IgG) seronegative (HSV1-) and seropositive (HSV1+) participants in patient/control status, sex, age, education years, handedness (right-handedness vs. left-handedness/ambidexterity), body mass index (BMI), alcohol use disorder identification test (AUDIT) score and drug use disorder identification test (DUDIT) score in the whole sample. P-values <0.05 shown in bold

<sup>1</sup>Number of participants with data for each variable

<sup>2</sup>Chi-square test or t-test

To investigate putative interaction effects, we ran full factorial median regressions: herpes virus simplex 1 (HSV1) status, diagnostic group status, sex, age and BMI on NSE and IL-18. In the NSE analysis, there were no three-way (HSV1 status-by-diagnostic group status-by sex,  $p=0.889$ ) or two-way interactions (HSV1 status-by-diagnostic group status,  $p=0.364$ , HSV1 status-by-sex,  $p=0.479$  or diagnostic group status-by-sex,  $p=0.229$ ). The corresponding p-values for the IL-18 analysis were 0.372, 0.203, 0.375 and 0.336.
